# Supplementary material
Source: PubMed Central journal article supplement (PMC4643429)
Supplement: NIHMS735052-supplement-Additional_Case_Study.pdf [file NIHMS735052-supplement-Additional_Case_Study.pdf]

**SUPPLEMENT TO: A REFERENCE-INVARIANT HEALTH  
DISPARITY INDEX BASED ON RÉNYI  
DIVERGENCE—ADDITIONAL CASE STUDY FROM  
NHANES**

BY MAKRAM TALIH\*

*National Center for Health Statistics*

Talih (2012) illustrates the use of the symmetrized Rényi index with National Health and Nutrition Examination Survey (NHANES) 2001–04 data on prevalence of moderate or severe periodontitis among U.S. adults aged 45–74. These binary individual-level data track Oral Health objective OH-5 in Healthy People 2020 (HP2020). NHANES is the data source for about 1 in 7 population-based objectives in HP2020. Close to one half of the (approximately) 1,200 objectives in HP2020 are population-based, and most population-based HP2020 objectives track a proportion or rate where the underlying individual-level variable has a binary outcome. This supplement provides further illustration of the proposed methodology in Talih (2012) using continuous individual-level data on total blood cholesterol levels from NHANES 2005–08. These data track Heart Disease and Stroke objective HDS-8 in HP2020, which aims to reduce the mean total blood cholesterol level of adults aged 20 and over.

*Disparities in mean total blood cholesterol level among U.S. adults aged 20 and over.* Healthy People 2020 (HP2020) objective HDS-8 in the Heart Disease and Stroke Topic Area aims to reduce the mean total blood cholesterol level of adults aged 20 and over. Table 1 presents age-adjusted estimates of mean total blood cholesterol levels (in  $\mu\text{g}/\text{dL}$ ) among U.S. adults aged 20 and over, as estimated from NHANES 2005–08. Those are the baseline data for HP2020 objective HDS-8 and the final data for Healthy People 2010 objective 12-13. As seen in Table 1, the groups with the lowest mean total cholesterol levels are non-Hispanic black adults, males, those with at least

---

\*The findings and conclusions in this paper are those of the author and do not necessarily represent the views of the CDC/National Center for Health Statistics. This work was performed while the author was on sabbatical leave from the City University of New York School of Public Health at Hunter College, where he was Associate Professor of Epidemiology and Biostatistics.

*AMS 2010 subject classifications:* Primary 94A17, 92C60, 62P25; Secondary 62G10, 62D05, 62P10.

*Keywords and phrases:* Epidemiological Methods, Health Inequalities, Alpha-gamma divergence, Survey Data, Taylor Series Linearization, Rescaled bootstrap.

a college degree, those with a family income 400–499 percent of the federal poverty level, and those born in the U.S. However, as documented in [National Center for Health Statistics \(2011; chapter 12\)](#), disparities relative to the group with the best rate remain generally either smaller than 10 percent or statistically non-significant.

< Insert Table 1 about here. >

To illustrate the utility of the symmetrized Rényi index (SRI) in investigating age group-specific disparities, we examine crude estimates of mean total blood cholesterol levels that are stratified by the age groups 25–44, 45–54, 55–64, 65–74, 75–79, and 80 and over; see [Table 2](#). In [Figure 1](#), we present only the standardized SRI values for the analysis by sex, where it is seen that the group weighting scheme (population-weighted vs. equally-weighted) has little to no effect. Further, the steady increase in the between-group SRI by sex for older age groups is documented in [Matthews \*et al.\* \(2009\)](#). However, overall, a large proportion of total or aggregate disparity in total blood cholesterol levels remains unexplained.

< Insert Table 2 and Figure 1 about here. >

TABLE 1  
*Total blood cholesterol levels (in  $\mu\text{g}/\text{dL}$ ) in U.S. adults aged 20 and over (age-adjusted), 2005–08.<sup>1</sup>*

|                                                | Mean <sup>2</sup> | SE <sup>3</sup> | 95% CI <sup>4</sup> |       |
|------------------------------------------------|-------------------|-----------------|---------------------|-------|
| <b>Total</b>                                   | 197.7             | 0.548           | 196.6               | 198.8 |
| <b>Sex</b>                                     |                   |                 |                     |       |
| Male                                           | 194.8             | 0.792           | 193.2               | 196.4 |
| Female                                         | 200.0             | 0.670           | 198.6               | 201.4 |
| <b>Race/Ethnicity</b>                          |                   |                 |                     |       |
| White only, non-Hispanic                       | 198.2             | 0.698           | 196.8               | 199.6 |
| Black only, non-Hispanic                       | 192.0             | 0.972           | 190.0               | 193.9 |
| Mexican-American                               | 201.0             | 1.420           | 198.1               | 203.9 |
| Other <sup>5</sup>                             | 198.4             | 1.440           | 195.5               | 201.3 |
| <b>Educational attainment<sup>6</sup></b>      |                   |                 |                     |       |
| Less than high school                          | 200.7             | 1.141           | 198.4               | 203.0 |
| High school graduate                           | 200.3             | 1.095           | 198.1               | 202.6 |
| Some college or AA degree                      | 200.8             | 0.971           | 198.8               | 202.7 |
| College graduate or above                      | 198.7             | 1.165           | 196.3               | 201.1 |
| <b>Family income (percent FPL<sup>7</sup>)</b> |                   |                 |                     |       |
| Less than 100                                  | 198.6             | 1.269           | 196.0               | 201.2 |
| 100–199                                        | 199.2             | 1.090           | 196.9               | 201.4 |
| 200–399                                        | 197.2             | 0.865           | 195.4               | 199.0 |
| 400–499                                        | 195.3             | 1.233           | 192.8               | 197.8 |
| 500 or above                                   | 198.0             | 1.309           | 195.4               | 200.7 |
| N/A <sup>8</sup>                               | 197.9             | 2.341           | 193.1               | 202.6 |
| <b>Country of birth</b>                        |                   |                 |                     |       |
| U.S.                                           | 197.3             | 0.597           | 196.1               | 198.5 |
| Outside U.S.                                   | 200.3             | 1.145           | 197.9               | 202.6 |

1. Data are from the National Health and Nutrition Examination Survey (NHANES) 2005–06 and 2007–08. Total cholesterol is a combination of high-density lipoproteins, low-density lipoproteins, and very-low density lipoproteins. It is measured enzymatically in a series of coupled reactions, as described in the NHANES laboratory procedures for total cholesterol measurement.
2. Estimates are age-adjusted (by the direct method) to the year 2000 U.S. population using the age groups 20–29, 30–39, 40–49, 50–59, 60–69, 70–79, and 80 and over.
3. Designed-based standard errors (SE) obtained via Taylor linearization (e.g., SUDAAN or R ‘survey’ package).
4. Lower and upper confidence limits, respectively, for a 95 percent confidence interval (CI).
5. The category *Other* consists of Hispanic or Latino other than Mexican-American and non-Hispanic of races other than black and white, including multiracial adults. The category *Other* is listed to provide a complete partition of the population into mutually exclusive groups, but it is not part of the HP2020 population template for objectives monitored using NHANES 1999 and later.
6. Educational attainment is for adults aged 25 and over. Age-adjustment groups are 25–29, 30–39, 40–49, 50–59, 60–69, 70–79, and 80 and over.
7. Family income as a percent of the federal poverty level (FPL), also known as the poverty income ratio (PIR).
8. Adults whose family PIR is not available (N/A), listed to maintain a complete partition of the population.

(Footnotes for Table 2.)

1. Data are from the National Health and Nutrition Examination Survey (NHANES) 2005–06 and 2007–08.
2. Designed-based standard errors (SE) obtained via Taylor linearization (e.g., SUDAAN or R ‘survey’ package).
3. Lower and upper confidence limits, respectively, for a 95 percent confidence interval (CI).
4. The category *Other* consists of Hispanic or Latino other than Mexican-American and non-Hispanic of races other than black and white, including multiracial adults. The category *Other* is listed to provide a complete partition of the population into mutually exclusive groups, but it is not part of the HP2020 population template for objectives monitored using NHANES 1999 and later.
5. Educational attainment is for adults aged 25 and over.
6. Family income as a percent of the federal poverty level (FPL), also known as the poverty income ratio (PIR).
7. Adults whose family PIR is not available (N/A), listed to maintain a complete partition of the population.
8. Data are statistically unreliable (DSU) due the sample size being less than 30.

SYMMETRIZED RÉNYI INDEX—ADDITIONAL CASE STUDY

TABLE 2. Total blood cholesterol levels ( $\mu\text{g/dL}$ ) in U.S. adults aged 20 years and over (stratified by age), 2005–08.<sup>1</sup>

|                                           | Ages 20–24 |                 |                     | Ages 25–44       |       |             | Ages 45–54 |        |             | Ages 55–64 |        |             |
|-------------------------------------------|------------|-----------------|---------------------|------------------|-------|-------------|------------|--------|-------------|------------|--------|-------------|
|                                           | Mean       | SE <sup>2</sup> | 95% CI <sup>3</sup> | Mean             | SE    | 95% CI      | Mean       | SE     | 95% CI      | Mean       | SE     | 95% CI      |
| <b>Total</b>                              | 176.5      | 1.892           | 172.6–180.3         | 195.9            | 0.961 | 193.9–197.9 | 206.7      | 1.308  | 204.1–209.4 | 208.0      | 1.640  | 204.7–211.4 |
| <b>Sex</b>                                |            |                 |                     |                  |       |             |            |        |             |            |        |             |
| Male                                      | 173.2      | 1.890           | 169.3–177.1         | 199.0            | 1.249 | 196.4–201.5 | 204.6      | 1.788  | 200.9–208.2 | 199.3      | 1.863  | 195.5–203.1 |
| Female                                    | 179.6      | 3.009           | 173.5–185.8         | 193.0            | 1.451 | 190.6–195.3 | 208.9      | 1.444  | 206.0–211.9 | 215.8      | 2.509  | 210.6–220.9 |
| <b>Race/Ethnicity</b>                     |            |                 |                     |                  |       |             |            |        |             |            |        |             |
| White only, non-Hispanic                  | 177.7      | 2.615           | 172.3–183.0         | 196.5            | 1.880 | 193.7–199.3 | 207.7      | 1.639  | 204.3–211.0 | 207.4      | 2.185  | 203.0–211.9 |
| Black only, non-Hispanic                  | 175.7      | 2.451           | 170.7–180.7         | 187.0            | 1.942 | 183.1–191.0 | 196.4      | 2.217  | 191.9–201.0 | 205.6      | 2.236  | 201.1–210.2 |
| Mexican-American                          | 176.9      | 2.492           | 171.8–182.0         | 199.1            | 1.789 | 195.4–202.7 | 210.3      | 2.493  | 205.2–215.4 | 210.3      | 2.963  | 204.3–216.4 |
| Other <sup>4</sup>                        | 170.2      | 4.506           | 161.0–179.4         | 198.1            | 2.159 | 193.7–202.5 | 209.2      | 5.160  | 198.7–219.7 | 214.4      | 4.110  | 206.1–222.8 |
| <b>Educational attainment<sup>5</sup></b> |            |                 |                     |                  |       |             |            |        |             |            |        |             |
| Less than high school                     | —          | —               | —                   | 196.2            | 1.655 | 192.8–199.5 | 207.3      | 2.351  | 202.5–212.1 | 212.0      | 2.498  | 206.9–217.1 |
| High school graduate                      | —          | —               | —                   | 197.4            | 1.788 | 193.8–201.1 | 208.6      | 2.232  | 204.0–213.1 | 205.0      | 3.482  | 198.3–212.5 |
| Some college or AA degree                 | —          | —               | —                   | 194.9            | 1.636 | 191.6–198.3 | 206.7      | 2.515  | 201.5–211.8 | 209.7      | 2.764  | 204.1–215.4 |
| College graduate or above                 | —          | —               | —                   | 195.6            | 2.198 | 191.1–200.1 | 204.8      | 2.258  | 200.2–209.4 | 206.9      | 2.047  | 202.8–211.1 |
| <b>Family income (% FPL<sup>6</sup>)</b>  |            |                 |                     |                  |       |             |            |        |             |            |        |             |
| Less than 100                             | 175.7      | 3.193           | 169.1–182.2         | 194.5            | 1.877 | 190.7–198.3 | 211.2      | 3.913  | 203.2–219.1 | 215.4      | 4.043  | 197.2–213.7 |
| 100–199                                   | 176.2      | 2.784           | 170.5–181.9         | 194.5            | 1.494 | 191.4–197.5 | 209.3      | 2.659  | 203.9–214.7 | 216.3      | 3.201  | 209.8–222.8 |
| 200–399                                   | 178.8      | 2.649           | 173.4–184.2         | 196.8            | 1.539 | 193.7–199.9 | 203.4      | 2.340  | 198.6–208.1 | 205.6      | 2.620  | 200.3–211.0 |
| 400–499                                   | 172.3      | 5.904           | 160.2–184.3         | 194.3            | 2.452 | 189.3–199.3 | 203.1      | 2.769  | 197.4–208.7 | 208.2      | 3.088  | 201.9–214.5 |
| 500 or above                              | 177.9      | 5.551           | 166.6–189.2         | 197.4            | 1.797 | 193.8–201.1 | 207.4      | 1.586  | 204.2–210.7 | 206.6      | 2.266  | 202.0–211.2 |
| N/A <sup>7</sup>                          | 171.3      | 6.107           | 158.8–183.7         | 196.9            | 4.868 | 187.0–206.9 | 209.8      | 3.531  | 202.6–217.0 | 210.3      | 4.618  | 200.9–219.7 |
| <b>Country of birth</b>                   |            |                 |                     |                  |       |             |            |        |             |            |        |             |
| U.S.                                      | 176.4      | 2.144           | 172.0–180.8         | 195.4            | 1.061 | 193.2–197.6 | 205.8      | 1.378  | 203.0–208.6 | 207.8      | 1.821  | 204.1–211.5 |
| Outside U.S.                              | 176.7      | 2.824           | 170.9–182.4         | 197.9            | 1.426 | 194.9–200.8 | 212.0      | 3.438  | 205.0–219.1 | 210.4      | 2.545  | 205.2–215.6 |
|                                           |            |                 |                     |                  |       |             |            |        |             |            |        |             |
| <b>Total</b>                              | 197.5      | 1.284           | 194.9–200.1         | 192.5            | 1.842 | 188.8–196.3 | 193.9      | 1.901  | 190.1–197.8 | 197.8      | 1.901  | 190.1–197.8 |
| <b>Sex</b>                                |            |                 |                     |                  |       |             |            |        |             |            |        |             |
| Male                                      | 183.6      | 1.576           | 180.4–186.8         | 183.0            | 2.616 | 177.7–188.4 | 176.0      | 1.850  | 172.2–179.8 | 176.0      | 1.850  | 172.2–179.8 |
| Female                                    | 208.7      | 1.729           | 205.1–212.2         | 200.5            | 2.500 | 195.4–205.6 | 204.9      | 2.330  | 200.2–209.7 | 204.9      | 2.330  | 200.2–209.7 |
| <b>Race/Ethnicity</b>                     |            |                 |                     |                  |       |             |            |        |             |            |        |             |
| White only, non-Hispanic                  | 197.5      | 1.565           | 194.3–200.7         | 193.1            | 2.071 | 188.9–197.3 | 193.4      | 2.093  | 189.2–197.7 | 193.4      | 2.093  | 189.2–197.7 |
| Black only, non-Hispanic                  | 199.0      | 2.886           | 193.1–204.9         | 185.6            | 4.887 | 175.6–195.6 | 199.4      | 5.370  | 188.4–210.3 | 199.4      | 5.370  | 188.4–210.3 |
| Mexican-American                          | 197.5      | 3.923           | 189.5–205.5         | 191.0            | 4.764 | 181.3–200.7 | 210.5      | 10.233 | 189.6–231.3 | 210.5      | 10.233 | 189.6–231.3 |
| Other                                     | 194.4      | 8.222           | 177.6–211.1         | 191.8            | 8.738 | 174.0–209.6 | 187.0      | 7.740  | 171.2–202.8 | 187.0      | 7.740  | 171.2–202.8 |
| <b>Educational attainment</b>             |            |                 |                     |                  |       |             |            |        |             |            |        |             |
| Less than high school                     | 199.5      | 2.967           | 193.5–205.6         | 186.3            | 3.376 | 179.4–193.2 | 196.1      | 3.339  | 189.3–202.9 | 196.1      | 3.339  | 189.3–202.9 |
| High school graduate                      | 198.0      | 3.029           | 191.8–204.2         | 187.1            | 2.441 | 182.1–192.1 | 189.6      | 2.708  | 184.1–195.1 | 189.6      | 2.708  | 184.1–195.1 |
| Some college or AA degree                 | 199.5      | 4.063           | 191.3–207.8         | 203.5            | 4.851 | 193.6–213.4 | 199.7      | 4.221  | 191.0–208.3 | 199.7      | 4.221  | 191.0–208.3 |
| College graduate or above                 | 192.9      | 2.469           | 187.9–197.9         | 200.1            | 6.440 | 187.0–213.3 | 189.2      | 5.501  | 178.0–200.4 | 189.2      | 5.501  | 178.0–200.4 |
| <b>Family income (% FPL)</b>              |            |                 |                     |                  |       |             |            |        |             |            |        |             |
| Less than 100                             | 207.2      | 5.704           | 195.5–218.8         | 198.8            | 4.416 | 189.8–207.8 | 195.7      | 5.732  | 184.0–207.3 | 195.7      | 5.732  | 184.0–207.3 |
| 100–199                                   | 202.6      | 3.706           | 195.0–210.2         | 189.7            | 3.151 | 183.3–196.1 | 199.1      | 3.061  | 192.9–205.3 | 199.1      | 3.061  | 192.9–205.3 |
| 200–399                                   | 196.9      | 2.691           | 191.5–202.4         | 191.7            | 3.490 | 184.6–198.9 | 191.6      | 3.828  | 183.7–199.4 | 191.6      | 3.828  | 183.7–199.4 |
| 400–499                                   | 195.9      | 4.761           | 186.2–205.6         | DSU <sup>8</sup> | —     | —           | DSU        | —      | —           | DSU        | —      | —           |
| 500 or above                              | 191.3      | 3.034           | 185.1–197.5         | 193.0            | 7.731 | 181.2–212.8 | 191.7      | 6.269  | 178.9–204.5 | 191.7      | 6.269  | 178.9–204.5 |
| N/A                                       | 187.8      | 6.715           | 174.1–201.5         | 193.9            | 6.766 | 180.1–207.7 | 188.4      | 5.026  | 178.1–198.6 | 188.4      | 5.026  | 178.1–198.6 |
| <b>Country of birth</b>                   |            |                 |                     |                  |       |             |            |        |             |            |        |             |
| U.S.                                      | 197.2      | 1.314           | 194.5–199.8         | 192.5            | 1.883 | 188.7–196.3 | 194.2      | 2.013  | 190.1–198.3 | 194.2      | 2.013  | 190.1–198.3 |
| Outside U.S.                              | 200.7      | 4.650           | 191.2–210.1         | 193.0            | 6.304 | 180.2–205.9 | 191.3      | 5.090  | 181.0–201.7 | 191.3      | 5.090  | 181.0–201.7 |

**References.**

- MATTHEWS, K. A., CRAWFORD, S. L., CHAE, C. U., EVERSON-ROSE, S. A., SOWERS, M. F., STERNFELD, B. and SUTTON-TYRRELL, K. (2009). Are Changes in cardiovascular disease risk factors in midlife women due to chronological aging or to the menopausal transition? *Journal of the American College of Cardiology* **54** 2366–73. doi:10.1016/j.jacc.2009.10.009.
- NATIONAL CENTER FOR HEALTH STATISTICS, (2011). *Healthy People 2010 Final Review*. National Center for Health Statistics, Hyattsville, MD.
- TALIH, M. (2012). A Reference-invariant health disparity index based on Rényi divergence. *Under Review*.

MAKRAM TALIH, PHD  
STATISTICIAN (HEALTH)—SENIOR SERVICE FELLOW  
CENTERS FOR DISEASE CONTROL AND PREVENTION  
NATIONAL CENTER FOR HEALTH STATISTICS  
OFFICE OF ANALYSIS AND EPIDEMIOLOGY  
HEALTH PROMOTION STATISTICS BRANCH  
3311 TOLEDO ROAD, ROOM 6317  
HYATTSVILLE, MD, 20782  
E-MAIL: [mtalih@cdc.gov](mailto:mtalih@cdc.gov)

SYMMETRIZED RÉNYI INDEX—ADDITIONAL CASE STUDY

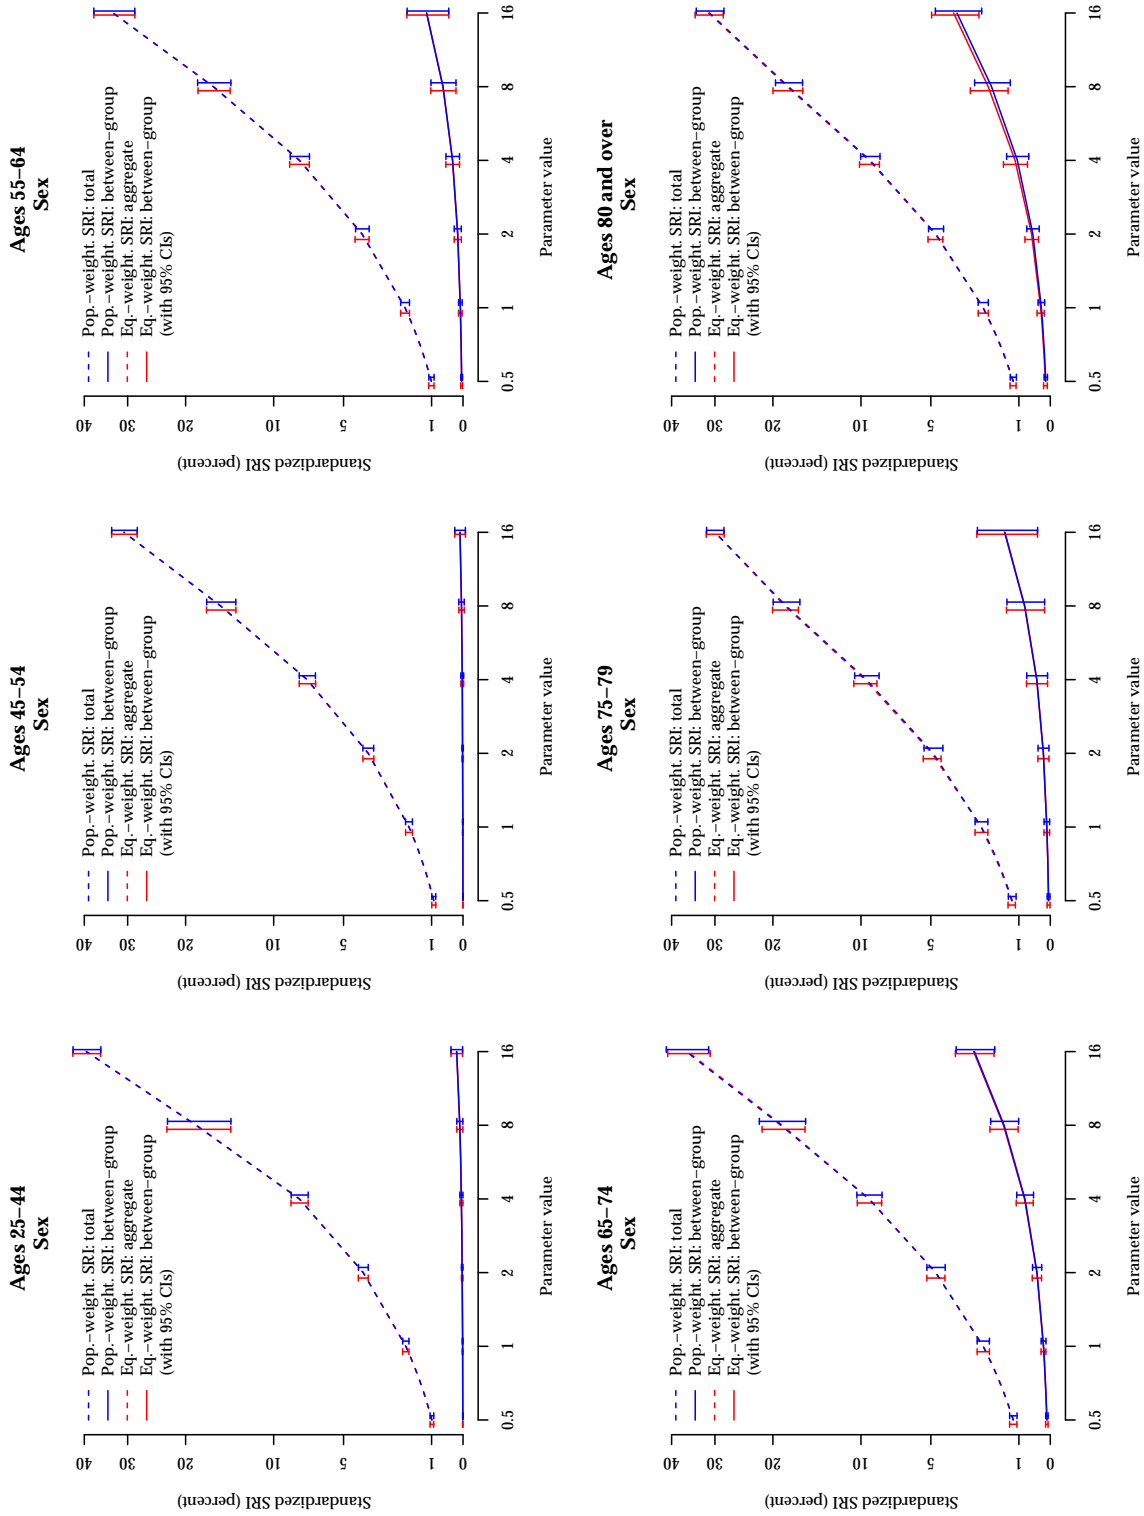

FIG 1. Total or aggregate and between-group components of the standardized SRI by sex for the mean total blood cholesterol levels ( $\mu\text{g/dL}$ ) in U.S. adults aged 25 and over, stratified by age, 2005–08. Due to symmetry of the SRI around the parameter value 0.5, only values of  $\alpha \geq 0.5$  are shown. For values of  $\alpha \geq 0.5$ , the parameter  $\alpha$  is a disparity aversion parameter for the standardized SRI: the standardized SRI is nondecreasing in  $\alpha$  for  $\alpha \geq 0.5$ . The population-weighted SRI uses the estimated distributions for the relative shares of population ( $p_j = n_j/n, p_{ij} = 1/n$ ) and of health outcome ( $q_j = y_j/y_{\cdot}, q_{ij} = y_{ij}/y_{\cdot}$ ) in the symmetrized Rényi divergence  $S_{\alpha}(p, q)$ . The equally-weighted SRI uses  $p_j = 1/m$ . The population-weighted and equally-weighted SRI are almost identical, here. The 95% confidence intervals (CIs) are design-based, obtained via Taylor linearization.
